# Supplementary material
Source: MDPI journal article supplement (https://www.mdpi.com/2073-4352/9/11/548)
Supplement: s1 [file s1]

5Z8T 1 -----MYDIYGEAAIPADVREIRITRDLA-QAFHERAPEHDRAGDFEFENIE  
3X0Y 1 -----MTLSPEKQHVPRDAADNDPVAVARGLA-EKWRATAVEERDRACGSATAERE  
4ZXV 1 MTKPSVHEHPGVLDNGLCEPKTPAGRRLDLIERYL-PAIEAESRDNDREATLEPVHIFD  
3MXL 1 -----MAADLRAPLTPAGRTVVDDLAVGI-PRISABAAARDRTGTFTFPVEAFE  
4KCF 1 ----MPPWTARQDSTTGLYAPVTPAGRVLLDRLAAHL-PRIRSTAAEHDRDGTFTFTDTFD  
4M9A 1 -----MDDLYTEDQRMILDAARAICAEVIAFNAAQWDRESHLPDEVVVA  
2DVL 1 -----MTLTOEQRLVLDVAVRVAREVILYPLAFEYDRKAEYFPWPQIK  
2D29 1 -----MGLWFEEGAEROVILGPREFELKAEVAPGAERDRTGAEFPWDLVR  
1BUC 1 -----MDFNLTDIQQDFLKLAHDFGEKKLAPTFTVTERDCHKIYDKELID  
4IV6 1 -----MALTAEEETIVKTVHDFVEKQVKPVVRELEHANTYPEELIE  
4KTO 1 -----MFEAGLNFAIGEITIDLRASVRREASERLAELADDADRSNAEFMSLWR

5Z8T 48 DLKASGYVRWTVPVVEYGGGLGL---SLEEMLMHOEVLLAKGDGSTALALGWH--VGILL-HL  
3X0Y 51 DLRASGLLSLLVPREYGGWGA---DWPTAIEVVRERIAAADGSLGHLFGYHLTNAPMIELI  
4ZXV 60 RMRKEGVLGATVPEDLGGLGVH--SLHDVALALARIAGRDAGVALAHMQFSRGLTDFE  
3MXL 47 QFAKILGLMGATVPAELGGLGLT--RLYDVATALMRLAEADASTALAWHVQLSRGLTTYE  
4KCF 56 ALRKDGLMGATVPAELGGLGVD--RLYDVAVALAVARADASTALAHMQLSRGLTLGYE  
4M9A 44 QMGELGFLGMIVPADWGGGSYT---DYVAYALALEEIIAAGCASCATLVSVH--NSVCGGP  
2DVL 42 ALAEELGLLGMTTPPEEWGGVGL---DSVTWALALEELAAADPSVAVIVSVT--SGLPQYMI  
2D29 46 KLAIEFGVFGALVPEAYGGAGL---STRLFARMVEALAYYDGAIALTVASH--NSLATGHI  
1BUC 44 ELLSLGITGAYFEEKYGGSGDDGGDVLSYILAVEELAKYDAGVAITLSAT--VSLCANPI  
4IV6 42 TMKEIGIFGLAIPPEPYGFGAV---SMPCYVQVAEELARGWMSLAGAMGGH---TVVSKLL  
4KTO 49 EMGELGLLGITADEAHGGAGL---GYLAHCVAMEEISRASASVGLSYGAH--SNLCVNQI

5Z8T 102 RETGAFPDE-LFRMVCESVVKEGALINSCATEPATGSPSRGGKPETTAVKVPGGYRITGR  
3X0Y 108 ---GSQEQE---EHLYTQIAQNNWWTGNASSE--NNSHVLDWKVRATPTE-DGGYVLNGT  
4ZXV 118 WRHGAPSTRPLAEDLLRQMGAGEAIVICGAV-----KDVRGTTVLTRAT--DGSYRLNGR  
3MXL 105 WQHGTPPVRAMAERLLRAMAEGEAAVCGAL-----KDAPGVVTELHSDG-AGGWILSGR  
4KCF 114 WRHGERARTLAERILRGMVAGDAVVCSGI-----KDHTTAVTTLRPDG-AGGWILSGR  
4M9A 99 LNYGTTEQK---ERWLRDLASGKTVGAFSLTEPHAGSEAHNLRTRAELR--DGKWLNGS  
2DVL 97 LRFGEAQK---RRYLVLPLARGEWIGAFCLTEPQAGSDAKSLRAEARV--KGGFVLNGV  
2D29 101 LLAGSEAQK---EAFLPKLASGEALGAWGLTEPGSGSDAAALKTKAEKV--EGGWRLNGT  
1BUC 102 WQFGTEAQK---EKFLVPLVEGTKLGAFGLTEPNAGTDASQOQTIATKND-DGTYTNGS  
4IV6 96 LLFGTEEQK---QKYLPRMATGELRATMALTEPGGGSDLQAMRTVARRD--GDDYVINGS  
4KTO 104 NRNGKPAQK---SRYLPKLISGEHVGALAMSEPGAGSDVVSMLKLADKR--GDRYVLNGS

5Z8T 161 KTFSTLSPALTWIMVTATVADED-----VVGQFLVRKED--VEIVETWDTLGMRAIGS  
3X0Y 159 KHFCSGAKGSDLLFVFGVVQDDSPQ---QGAIIAAAIPTSRAGVTPNDDWAAIGMRQTDS  
4ZXV 170 KTLVSMAGIATHYVVSTRLEEAGAP---V-RLAAPVVARTTPGLTVLDNWDMGMRSSGS  
3MXL 158 KVLVSMAPIATHFFVHAQRRDDDGs---V-FLAVPVVHRDAPGLTVLDNWDMGLMRASGT  
4KCF 167 KTLVSMAPVGTHFVINARTDGTGDP---P-RLASPVVTRDTPGFTVLNDWDMGLMRASGT  
4M9A 154 KQFVTNGARAGLAIVFAMTDPDECK---R-GLSAFVVPTDTPGFIVGKPEKKMGIRASDT  
2DVL 152 KSWITSAGHAHLYVVMARTEK-----GISAFLVEKGTGGLSFRPEEKMGLHAAHT  
2D29 156 KQFITQGSVAGVYVVMARTDPPSPERKHQGISAFAFFRPERGLKVGKKEEKLGLTASDT  
1BUC 158 KIFITNGGAADIYIVFAMTDKSKGN---H-GITAFILEDGTPGFTYGKKEDKMGIHITSQT  
4IV6 151 KTWISNARRSDIVALMCKTDPDAQP---AHKGVSILLVEKVPGFDFVSRDLPKLGYKGVES  
4KTO 159 KMWITNGPDADVLVVYAKTDPAAAGP---R-GITAFIVEKAFPGFSAGQKLDKLGMRGSNT

5Z8T 212 HDIVLKDVFVPEERVIVIQ-RPGVQAERRPDG-SGW-----LHHPACYLGIALAARDF  
3X0Y 216 GSTDFHNVKVEPDEVL--G-APNAFVLAFIQSERGSLFAPIAQLIFANVYLGIAHGALDA  
4ZXV 226 VDIVFDGCPVDRDRVLPRG-EPGVRDDAALAGQTVS-----SIAMLGIIYVGLIAEAARRI  
3MXL 214 LEVVFDRCPVRADELLERG-PVGARRDAVLAGQTVS-----SITMLGIYAGIAQAARDI  
4KCF 223 VDIVFDDCPIPADHVLMRD-PVGARRDAVLAGQTVS-----SVSLVGYVGVQAQAYDT  
4M9A 210 CPITLENCAIPQENLL--G-KRGEGLKIALSNLEGG-----RIGIAAQATGIARAADFDR  
2DVL 203 AEVRLEEIVFVPEENLL--G-EEGRGLAYALAGLDG-----RVGVAAQAVGIARGAFEI  
2D29 216 AQLILEDLFVPEEALL--G-ERKGKFYDVLRLVLDGG-----RIGIAAMAVGLGQAALDY  
1BUC 214 MELVFQDVKVPAENML--G-EEGKGFKIAMMTLDGG-----RIGVAAQALGIAEAALAD  
4IV6 208 CELNFTDARVPVSSLL--GDDEGRGFAQMMKGLEVG-----RLQVAARATGVARAAFED  
4KTO 215 SELIFTDCEVPEENVL--G-GVGEQGVKVLMSGLDYE-----RVVLSAGPLGIMAACLDV

\*

5Z8T 264 ALEYAATYRPNTLPHPIAEVP-----HVEQKLGEMLKLLAARTLLYDLARRF  
3X0Y 273 AREYTR--TQARPWTGAGIQQATEDPYTIRSYGEFTIALQGADAAAREAAHLLQTVWDKG  
4ZXV 279 ALTELRL--RRGGAPAGVRTTVA-----EIDARLFAHTAVASALTADRLADDL  
3MXL 267 AVGFCA--GRGGEPRAGARALVA-----GLDTRLIYALRTTVGAALTNADAASVDL  
4KCF 276 AVAALE--RRPEPPQAAALTIVA-----EIDSRLIYALRATAGSALTAADALSADL  
4M9A 261 ARRYAR--ERVQFGKPIAEHQ-----ATAEKLANMATQINAAARLLTHHAARLR  
2DVL 254 AKAYAE--EREQFGKKLKEHQ-----ATAFKIADMHVKIAAARALVLEAARKK  
2D29 267 ALAYAK--GREAFGRPIAEFE-----GVSFKLAEAAATELEAARLLYLKAAELK  
1BUC 265 AVEYSK--QRVQFGKPLCKFQ-----SISFKLADMKMQIEAARNLVYKAACKK  
4IV6 260 ALRYSQ--ERESFGKPIWQHQ-----SVGNMLADMGTKLYAARSLILLSAAEKF  
4KTO 266 VVPYLH--ERKQFGQPIGEFQ-----LMQGKLADMVYTMNAARAYVYAVAAAC

5Z8T 312 DAASPEERVKLQPQFGAVKTLATNAANQVVDLAMRVVGGRSLSRALPLERYRDRVAGLH  
3X0Y 331 DALTPEDRGELMVKVSQVKAATNAALNISSGVFEVIGARGTHPRYGFDRFWRNVRTSHL  
4ZXV 326 SGDLAARGRAMMTPFQYAKLLVNRHVSQVGVDDCLMLVGAGYSNSHPLARLYRDVRAGGF  
3MXL 315 SGDPDERGRMMTPFQYAKMTVNELAPAVVDDCLSLVGGGLAYTAGHPLSRLYRDVRAGGF  
4KCF 324 SGDMDERGRQMMRHQCAKLAVNRLAPEIVSDCLSLVGGGASYTAGHPLARLLRDVQAGRF  
4M9A 307 T-----AGLPCLSEASQAKLFASEMAEAVCSDAIQIHGGYGFLVDYEVERHYRDARITQI  
2DVL 300 D-----RGERFTLEASAAKLFASAAAVEVTREAVQVLGGYGYHRDYRVERYRDAKVTEI  
2D29 313 D-----AGRPFTLEAAQAKLFASEAAVKACDEAIQILGGYGYVKDYPVERYRDRARLTRI  
1BUC 311 Q-----EGKPFTVDAAIKRVASDVAMRVTTAEVQIFGGYGYSEEPVARHMRDAKITQI  
4IV6 306 D-----AGQRCDMAGMAKLFASETAMQIALDAVRVHGGYGYSTEYDVERYFRDAPLMIV  
4KTO 312 D-----RGETARKDAAGCILYAAEKATAMALEAIQALGGNGYTNDYPAGRLLLRDAKLYEI

5Z8T 372 NPP---MDDVVYRNLAKAALARRAAGQAGR-----  
3X0Y 391 HDPVSYKIADVKGKHTLNGQYPIPGFTS-----  
4ZXV 386 MHP--YNFITDGDVYLSAVALGR-----  
3MXL 375 MQP--YSYVDADVLYLSQALGLDRDNDYMSVRALRS-----RTSA  
4KCF 384 MQP--YAYVDAVDFLSAQALGIERNNYMSTWAKRSGGNGKSADAAGPRRPTPTSR  
4M9A 362 YEG---TSEVQRMVIARQI-----  
2DVL 355 YEG---TSEIQRLVIARELYR-----  
2D29 368 GEG---TSEILKLVIARRLLEAV-----  
1BUC 366 YEG---TNEVQLMVTGGALLR-----  
4IV6 361 GEG---TNEIQRNVIAKQLVARGGLDI-----  
4KTO 367 GAG---TSEIRRMLIGRELFAETK-----

\*
